# Supplementary material for: Lithium phenolates with a hexagonal-prismatic Li6O6 core isolated via a cage-shaped tripodal ligands system: crystal structures and their behavior in solution
Source: Royal Society of Chemistry journal article supplement (doi:10.1039/c2dt30266g), 2012-01-01

## Electronic Supplementary Information

### Lithium phenolates with a hexagonal-prismatic $\text{Li}_6\text{O}_6$ core isolated via a cage-shaped tripodal ligands system: crystal structures and their behavior in solution

Hideto Nakajima, Makoto Yasuda, and Akio Baba

*Department of Applied Chemistry, Graduate School of Engineering, Osaka University, 2-1 Yamadaoka, Suita, Osaka 565-0871, Japan*

**General.** IR spectra were recorded as thin films or as solids in KBr pellets on a HORIBA FT-720 spectrophotometer.  $^1\text{H}$  and  $^{13}\text{C}$  spectra were obtained with a 400 and 100 MHz spectrometer, respectively, with TMS as internal standard.  $^{19}\text{F}$  NMR spectra were obtained with a 372 MHz spectrometer with  $\text{BF}_3\cdot\text{OEt}_2$  in  $\text{CDCl}_3$  as external standard.  $^7\text{Li}$  NMR spectra were obtained with a 154 MHz spectrometer with  $\text{LiCl}$  in  $\text{D}_2\text{O}$  as external standard.  $^{19}\text{F}$  NMR spectra were obtained with a 372 MHz spectrometer with  $\text{BF}_3\cdot\text{OEt}_2$  in  $\text{CDCl}_3$  as external standard. Mass spectra were recorded on a JEOL JMS-DS303. All reactions were carried out under nitrogen. Synthesis of lithium complexes was performed in nitrogen-filled glove box.

**Materials.** Dehydrated dichloromethane, THF, and hexane were purchased and used as obtained. The compounds **1a-dH<sub>3</sub>** were prepared according to our previous report.<sup>[1]</sup> All other reagents are commercially available.

**(1aLi<sub>3</sub>)<sub>2</sub>·(THF)<sub>6</sub>**

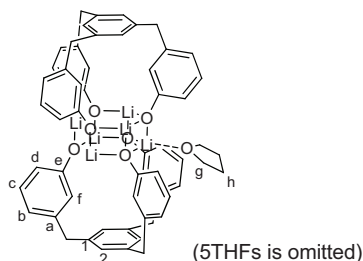

In a glove box, to a mixture of 1,3,5-tris(3-hydroxybenzyl)benzene (0.1 mmol = 39.8 mg) in THF (5 mL) was added *n*-BuLi in hexane (0.318 mmol, 0.2 mL, 1.59 M) at -30 °C with stirring. The stirring was kept for 2 h with warming up to rt. Evaporation of volatiles gave a white solid. The obtained crude materials were washed with hexane and evaporated to give the product quantitatively. The product was recrystallized from dichloromethane/hexane(2/1) for X-ray analysis. <sup>1</sup>H NMR: (400 MHz, CDCl<sub>3</sub>) 6.88 (m, 12H, c-H and 2-H), 6.49 (d, *J* = 7.6 Hz, 6H, b-H), 6.23 (dd, *J* = 7.6, 1.8 Hz, 6H, d-H), 5.86 (s, 6H, f-H), 3.91 (s, 12H, 1-CH<sub>2</sub>), 3.19 (br, 24H, g-H<sub>2</sub>), 1.47 (br, 24H, h-H<sub>2</sub>); <sup>13</sup>C NMR: (100 MHz, CDCl<sub>3</sub>) 166.0 (s, C-e), 143.7 (s, C-a), 141.7 (s, C-1), 130.0 (d, C-2), 128.6 (d, C-c), 121.2 (d, C-f), 116.7 (d, C-d), 115.2 (d, C-b), 67.6 (t, C-g), 40.6 (t, 1-CH<sub>2</sub>), 25.1 (t, C-h); <sup>7</sup>Li NMR: (153.7 MHz, CDCl<sub>3</sub>) 0.08.

**(1bLi<sub>3</sub>)<sub>2</sub>·(THF)<sub>6</sub>**

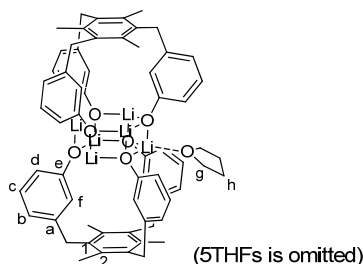

In a glove box, to a mixture of 1,3,5-tris(3-hydroxybenzyl)-2,4,6-trimethylbenzene (0.1 mmol = 43.8 mg) in THF (5 mL) was added *n*-BuLi in hexane (0.318 mmol, 0.2 mL, 1.59 M) at -30 °C with stirring. The stirring was kept for 2 h with warming up to rt. Evaporation of volatiles gave a

white solid. The obtained crude materials were washed with hexane and evaporated to give the product quantitatively. The product was recrystallized from dichloromethane/hexane(2/1) for X-ray analysis.  $^1\text{H}$  NMR: (400 MHz,  $\text{CDCl}_3$ ) 6.90 (dd,  $J = 8.0, 7.8$  Hz, 6H, c-H), 6.58 (d,  $J = 7.8$  Hz, 6H, b-H), 6.20 (dd,  $J = 8.0, 1.8$  Hz, 6H, d-H), 5.91 (s, 6H, f-H), 4.13 (s, 12H, 1- $\text{CH}_2$ ), 3.13 (br, 24H, g- $\text{H}_2$ ), 2.08 (s, 18H, 2- $\text{CH}_3$ ), 1.51 (br, 24H, h- $\text{H}_2$ );  $^{13}\text{C}$  NMR: (100 MHz,  $\text{CDCl}_3$ ) 165.9 (s, C-e), 141.8 (s, C-a), 135.5 (s, C-2), 134.5 (s, C-1), 128.7 (d, C-c), 119.4 (d, C-f), 116.5 (d, C-d), 116.1 (d, C-b), 67.6 (t, C-g), 34.8 (t, 1- $\text{CH}_2$ ), 25.3 (t, C-h), 16.3 (q, 2- $\text{CH}_3$ );  $^7\text{Li}$  NMR: (153.7 MHz,  $\text{CDCl}_3$ ) 0.06.

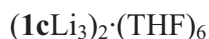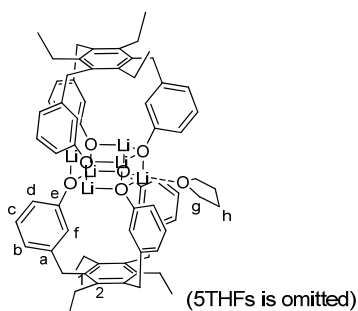

In a glove box, to a mixture of 1,3,5-tris(3-hydroxybenzyl)-2,4,6-triethylbenzene (0.1 mmol = 48.3 mg) in THF (5 mL) was added *n*-BuLi in hexane (0.318 mmol, 0.2 mL, 1.59 M) at  $-30$  °C with stirring. The stirring was kept for 2 h with warming up to rt. Evaporation of volatiles gave a white solid. The obtained crude materials were washed with hexane and evaporated to give the product quantitatively. The product was recrystallized from dichloromethane/hexane(2/1) for X-ray analysis.  $^1\text{H}$  NMR: (400 MHz,  $\text{CDCl}_3$ ) 6.88 (dd,  $J = 7.8, 7.8$  Hz, 6H, c-H), 6.57 (d,  $J = 7.8$  Hz, 6H, b-H), 6.20 (d,  $J = 7.8, 1.6$  Hz, 6H, d-H), 5.92 (s, 6H, f-H), 4.04 (s, 12H, 1- $\text{CH}_2$ ), 3.07 (t,  $J = 6.5$  Hz, 24H, g- $\text{H}_2$ ), 2.30 (q,  $J = 7.4$  Hz, 12H, 2- $\text{CH}_2$ ), 1.47 (t,  $J = 6.5$  Hz, 24H, h- $\text{H}_2$ ), 1.22 (t,  $J = 7.4$  Hz, 18H, 2- $\text{CH}_2\text{CH}_3$ );  $^{13}\text{C}$  NMR: (100 MHz,  $\text{CDCl}_3$ ) 166.3 (s, C-e), 142.3 (s, C-a), 141.5 (s, C-2), 134.4 (s, C-1), 128.5 (d, C-c), 120.0 (d, C-f), 116.6 (d, C-d), 115.6 (d, C-b), 67.5 (t, C-

g), 33.6 (t, 1-CH<sub>2</sub>), 25.3 (t, C-h), 23.5 (t, 2-CH<sub>2</sub>), 16.0 (q, 2-CH<sub>2</sub>CH<sub>3</sub>); <sup>7</sup>Li NMR: (153.7 MHz, CDCl<sub>3</sub>) -0.01.

(**1dLi**<sub>3</sub>)<sub>2</sub>·(THF)<sub>6</sub>

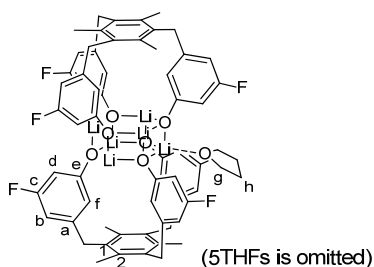

In a glove box, to a mixture of 1,3,5-tris(3-fluoro-5-hydroxybenzyl)-2,4,6-trimethylbenzene (0.1 mmol = 49.2 mg) in THF (5 mL) was added *n*-BuLi in hexane (0.318 mmol, 0.2 mL, 1.59 M) at -30 °C with stirring. The stirring was kept for 2 h with warming up to rt. Evaporation of volatiles gave a white solid. The obtained crude materials were washed with hexane and evaporated to give the product quantitatively. The product was recrystallized from dichloromethane/hexane(2/1) for X-ray analysis. <sup>1</sup>H NMR: (400 MHz, CDCl<sub>3</sub>) 6.31 (d, <sup>3</sup>J<sub>FH</sub> = 9.4 Hz, 6H, b-H), 5.90 (dd, <sup>3</sup>J<sub>FH</sub> = 12.0, 1.6 Hz, 6H, d-H), 5.62 (s, 6H, f-H), 4.07 (s, 12H, 1-CH<sub>2</sub>), 3.14 (br, 24H, g-H<sub>2</sub>), 2.04 (s, 18H, 2-CH<sub>3</sub>), 1.56 (br, 24H, h-H<sub>2</sub>); <sup>13</sup>C NMR: (100 MHz, CDCl<sub>3</sub>) 167.6 (s, d by <sup>3</sup>J<sub>CF</sub> = 11.5 Hz, C-e), 164.3 (s, d by <sup>1</sup>J<sub>CF</sub> = 243.6 Hz, C-c), 142.7 (s, d by <sup>3</sup>J<sub>CF</sub> = 10.3 Hz, C-a), 135.1 (s, C-1 or C-2), 134.7 (s, C-1 or C-2), 115.1 (d, C-f), 103.5 (d, d by <sup>2</sup>J<sub>CF</sub> = 19.7 Hz, C-d), 102.5 (d, d by <sup>2</sup>J<sub>CF</sub> = 21.4 Hz, C-b), 67.8 (t, C-g), 34.9 (t, 1-CH<sub>2</sub>), 25.3 (t, C-h), 16.3 (q, 2-CH<sub>3</sub>); <sup>7</sup>Li NMR: (153.7 MHz, CDCl<sub>3</sub>) -0.18; <sup>19</sup>F NMR: (372.35 MHz, CDCl<sub>3</sub>) 37.38 (dd, <sup>3</sup>J<sub>FH</sub> = 10.7, 10.7 Hz)

(**1bLi**<sub>3</sub>)(**1dLi**<sub>3</sub>)·(THF)<sub>6</sub>

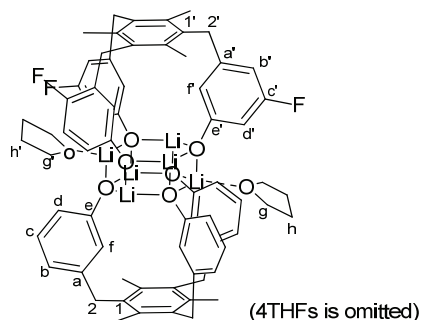

Each compound  $(\mathbf{1bLi}_3)_2 \cdot (\text{THF})_6$  and  $(\mathbf{1dLi}_3)_2 \cdot (\text{THF})_6$  was dissolved in  $\text{CDCl}_3$  to prepare 0.01 M solutions. They were mixed with ratios of 1/1 at room temperature. In the resulting mixture,  $(\mathbf{1bLi}_3)(\mathbf{1dLi}_3) \cdot (\text{THF})_6$  was observed accompanied with the starting homoaggregated species  $(\mathbf{1bLi}_3)_2 \cdot (\text{THF})_6$  and  $(\mathbf{1dLi}_3)_2 \cdot (\text{THF})_6$ . Selected signals for  $(\mathbf{1dLi}_3)(\mathbf{1dLi}_3) \cdot (\text{THF})_6$  are shown.  $^1\text{H}$  NMR: (400 MHz,  $\text{CDCl}_3$ ) 6.90 (m, 3H, c-H), 6.58 (m, 3H, b-H), 6.31 (m, 3H, b'-H), 6.18 (m, 3H, d-H), 5.90 (m, 6H, f-H and d'-H), 5.62 (s, 3H, f'-H), 4.13 (s, 6H, 1- $\text{CH}_2$ ), 4.07 (s, 6H, 1'- $\text{CH}_2$ ), 3.13 (br, 24H, g- $\text{H}_2$  and g'- $\text{H}_2$ ), 2.07 (s, 9H, 2- $\text{CH}_3$ ), 2.05 (s, 9H, 2'- $\text{CH}_3$ ), 1.57 (br, 24H, h- $\text{H}_2$  and h'- $\text{H}_2$ );  $^7\text{Li}$  NMR: (153.7 MHz,  $\text{CDCl}_3$ ) -0.05;  $^{19}\text{F}$  NMR: (372.35 MHz,  $\text{CDCl}_3$ ) 37.22 (dd,  $^3J_{\text{FH}} = 10.7, 10.7$  Hz)

### Method of Continuous Variation (Figure 2)

A ligand exchange between lithium phenolates (**1bLi<sub>3</sub>**)<sub>2</sub>·(THF)<sub>6</sub> and (**1dLi<sub>3</sub>**)<sub>2</sub>·(THF)<sub>6</sub> is described below.

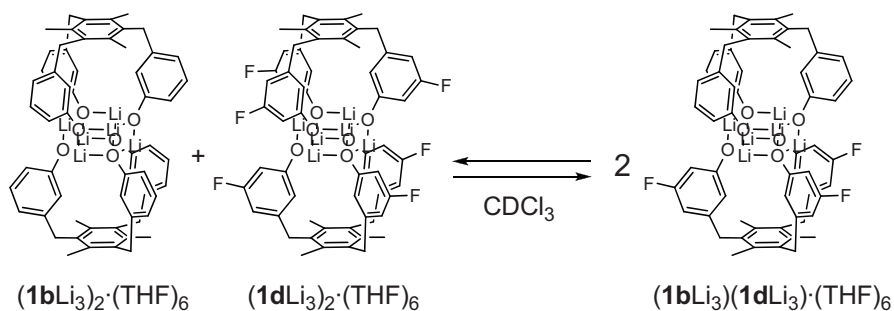

|                                      | ( <b>1bLi<sub>3</sub></b> ) <sub>2</sub> ·(THF) <sub>6</sub> | ( <b>1dLi<sub>3</sub></b> ) <sub>2</sub> ·(THF) <sub>6</sub> | ( <b>1bLi<sub>3</sub></b> )( <b>1dLi<sub>3</sub></b> )·(THF) <sub>6</sub> |
|--------------------------------------|--------------------------------------------------------------|--------------------------------------------------------------|---------------------------------------------------------------------------|
| molar ratios at an initial state     | 1                                                            | r                                                            | 0                                                                         |
| molar ratios at an equilibrium state | 1-α                                                          | r-α                                                          | 2α                                                                        |

Molar ratio *s* of (**1dLi<sub>3</sub>**)<sub>2</sub>·(THF)<sub>6</sub> to (**1bLi<sub>3</sub>**)(**1dLi<sub>3</sub>**)·(THF)<sub>6</sub> was measured by <sup>19</sup>F NMR integration.

$$s = \frac{[(\mathbf{1dLi}_3)_2 \cdot (\text{THF})_6]}{[(\mathbf{1bLi}_3)(\mathbf{1dLi}_3) \cdot (\text{THF})_6]}$$

Molar ratios of formed lithium phenolates under an equilibrium state were expressed by following equation.

$$s = \frac{r-\alpha}{2\alpha}$$

$$\alpha = \frac{r}{2s+1}$$

$$\text{molar ratio of } (\mathbf{1bLi}_3)_2 \cdot (\text{THF})_6 = \frac{1-\alpha}{1+r} \quad (1)$$

$$\text{molar ratio of } (\mathbf{1dLi}_3)_2 \cdot (\text{THF})_6 = \frac{r-\alpha}{1+r} \quad (2)$$

$$\text{molar ratio of } (\mathbf{1bLi}_3)(\mathbf{1dLi}_3) \cdot (\text{THF})_6 = \frac{2\alpha}{1+r} \quad (3)$$

Each compound (**1bLi<sub>3</sub>**)<sub>2</sub>·(THF)<sub>6</sub> and (**1dLi<sub>3</sub>**)<sub>2</sub>·(THF)<sub>6</sub> was dissolved in CDCl<sub>3</sub> to prepare 0.01 M solutions. They were mixed with ratios of 1/4, 2/3, 1/1, 3/2, and 4/1 ( $\chi = 0.2, 0.4, 0.5, 0.6,$  and 0.8) at room temperature. Molar ratios of formed species were estimated by equations 1-3 described above.

### Rate of Ligand-Exchange (Table 2)

Each compound  $(\mathbf{1bLi}_3)_2 \cdot (\text{THF})_6$  and  $(\mathbf{1dLi}_3)_2 \cdot (\text{THF})_6$  was dissolved in  $\text{CDCl}_3$  to prepare 0.01 M solutions. The pre-mixed solvents were prepared from  $\text{CDCl}_3$  and THF at various ratios ( $\text{CDCl}_3:\text{THF} = 50/50, 80/20, 90/10, 100/0$ ). To the pre-mixed solvents (0.1 mL), the solutions of  $(\mathbf{1bLi}_3)_2 \cdot \text{THF}$  (0.25 mL) and  $(\mathbf{1dLi}_3)_2 \cdot \text{THF}$  (0.25 mL) were added at room temperature. Molar ratios of  $(\mathbf{1bLi}_3)(\mathbf{1dLi}_3) \cdot (\text{THF})_6$  were estimated by equation 3 described above.

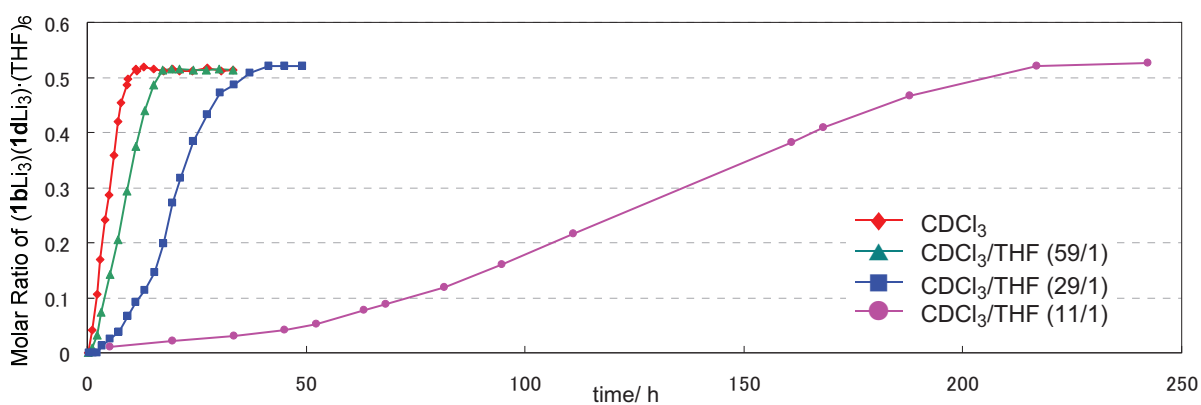

**Figure S1.** Effect of solvent systems on relationship between formed amount of  $(\mathbf{1bLi}_3)(\mathbf{1dLi}_3) \cdot (\text{THF})_6$  and reaction time.

### Crystal Structure Determination

The single-crystal structure data of complexes  $(\mathbf{1aLi}_3)_2 \cdot (\text{THF})_6$ ,  $(\mathbf{1bLi}_3)_2 \cdot (\text{THF})_6$ ,  $(\mathbf{1cLi}_3)_2 \cdot (\text{THF})_6$ , and  $(\mathbf{1bLi}_3)_2 \cdot (\text{THF})_4$  were determined by a Rigaku RAXIS RAPID imaging plate area detector with graphite monochromated Mo-K $\alpha$  ( $\lambda = 0.71075 \text{ \AA}$ ) radiation at 273 (2) K. The single-crystal structure data of complexes  $(\mathbf{1dLi}_3)_2 \cdot (\text{THF})_6$  was determined by a Rigaku RAXIS RAPID imaging plate area detector with graphite monochromated Mo-K $\alpha$  ( $\lambda = 0.71075 \text{ \AA}$ ) radiation at 253 (2) K.

Following shelxl restraints were used for  $(\mathbf{1aLi}_3)_2 \cdot (\text{THF})_6$ ;

DELU C10 > C17

SIMU 0.04 0.08 C10 > C17

SAME C14 > C17

SAME C13 < C10

Following shelxl restraints were used for  $(\mathbf{1cLi}_3)_2 \cdot (\text{THF})_6 \cdot 0.5(\text{C}_6\text{H}_6)$ ;

DFIX 1.39 0.02 C46 C49 C49 C47 C47 C46\_\$1

DANG 2.42 0.04 C46 C47 C49 C46\_\$1 C49 C47\_\$1



**Table S1.** X-ray data for all crystallographically characterized complexes.

|                                        | ( <b>1a</b> Li <sub>3</sub> ) <sub>2</sub> ·(THF) <sub>6</sub>  | ( <b>1b</b> Li <sub>3</sub> ) <sub>2</sub> ·(THF) <sub>6</sub>   | ( <b>1c</b> Li <sub>3</sub> ) <sub>2</sub> ·(THF) <sub>6</sub> ·0.5(C <sub>6</sub> H <sub>6</sub> ) | ( <b>1d</b> Li <sub>3</sub> ) <sub>2</sub> ·(THF) <sub>6</sub> ·0.25(C <sub>6</sub> H <sub>6</sub> ) | ( <b>1e</b> Li <sub>3</sub> ) <sub>2</sub> ·(THF) <sub>4</sub> ·3(C <sub>6</sub> H <sub>6</sub> ) |
|----------------------------------------|-----------------------------------------------------------------|------------------------------------------------------------------|-----------------------------------------------------------------------------------------------------|------------------------------------------------------------------------------------------------------|---------------------------------------------------------------------------------------------------|
| chemical formula                       | C <sub>78</sub> H <sub>90</sub> Li <sub>6</sub> O <sub>12</sub> | C <sub>84</sub> H <sub>102</sub> Li <sub>6</sub> O <sub>12</sub> | C <sub>93</sub> H <sub>113</sub> Li <sub>6</sub> O <sub>12</sub>                                    | C <sub>171</sub> H <sub>195</sub> F <sub>12</sub> Li <sub>12</sub> O <sub>24</sub>                   | C <sub>94</sub> H <sub>104</sub> Li <sub>6</sub> O <sub>10</sub>                                  |
| formula weight                         | 1261.21                                                         | 1345.37                                                          | 1468.51                                                                                             | 2945.68                                                                                              | 1435.50                                                                                           |
| space group                            | <i>Pa</i> -3                                                    | <i>Pa</i> -3                                                     | <i>P</i> 2 <sub>1</sub> / <i>n</i>                                                                  | <i>Pcca</i>                                                                                          | <i>P</i> -1                                                                                       |
| $\mu$ (Mo-K) (mm <sup>-1</sup> )       | 0.076                                                           | 0.077                                                            | 0.072                                                                                               | 0.086                                                                                                | 0.073                                                                                             |
| <i>a</i> (Å)                           | 19.2239(12)                                                     | 19.5449(6)                                                       | 12.3152(5)                                                                                          | 31.5198(6)                                                                                           | 12.9238(13)                                                                                       |
| <i>b</i> (Å)                           | -                                                               | -                                                                | 15.6985(7)                                                                                          | 16.6893(3)                                                                                           | 13.6966(15)                                                                                       |
| <i>c</i> (Å)                           | -                                                               | -                                                                | 22.3318(8)                                                                                          | 31.2344(6)                                                                                           | 14.6695(15)                                                                                       |
| $\alpha$ (deg)                         | -                                                               | -                                                                | -                                                                                                   | -                                                                                                    | 67.099(2)                                                                                         |
| $\beta$ (deg)                          | -                                                               | -                                                                | 94.310(1)                                                                                           | -                                                                                                    | 64.141(2)                                                                                         |
| $\gamma$ (deg)                         | -                                                               | -                                                                | -                                                                                                   | -                                                                                                    | 64.306(2)                                                                                         |
| <i>V<sub>c</sub></i> (Å <sup>3</sup> ) | 7104.3(8)                                                       | 7466.2(4)                                                        | 4305.2(3)                                                                                           | 16430.6(5)                                                                                           | 2040.5(4)                                                                                         |
| <i>Z</i>                               | 4                                                               | 4                                                                | 2                                                                                                   | 4                                                                                                    | 1                                                                                                 |
| <i>R</i> 1                             | 0.1069                                                          | 0.0845                                                           | 0.0737                                                                                              | 0.0784                                                                                               | 0.0946                                                                                            |
| <i>wR</i> 2                            | 0.2860                                                          | 0.2687                                                           | 0.2325                                                                                              | 0.2628                                                                                               | 0.2804                                                                                            |

**Table S2.** Selected bond lengths [Å] and angles [degree] for **(1a-cLi<sub>3</sub>)<sub>2</sub>·(THF)<sub>6</sub>**.

|                   |                                                           | <b>(1aLi<sub>3</sub>)<sub>2</sub>·(THF)<sub>6</sub></b> |          | <b>(1bLi<sub>3</sub>)<sub>2</sub>·(THF)<sub>6</sub></b> |          | <b>(1cLi<sub>3</sub>)<sub>2</sub>·(THF)<sub>6</sub>·0.5(C<sub>6</sub>H<sub>6</sub>)</b> |          |
|-------------------|-----------------------------------------------------------|---------------------------------------------------------|----------|---------------------------------------------------------|----------|-----------------------------------------------------------------------------------------|----------|
| Length<br>(Å)     | Li-O <sub>Ar</sub><br>(six-member ring)                   | 1.966(8)                                                | 1.964(8) | 1.985(5)                                                | 1.953(5) | 1.983(4)                                                                                | 1.959(4) |
|                   |                                                           |                                                         |          |                                                         |          | 1.990(4)                                                                                | 1.974(4) |
|                   |                                                           |                                                         |          |                                                         |          | 1.975(4)                                                                                | 1.984(5) |
|                   | Li-O <sub>Ar</sub><br>(vertical)                          | 1.964(8)                                                |          | 1.969(5)                                                |          | 1.944(5)                                                                                | 1.996(4) |
|                   |                                                           |                                                         |          |                                                         |          | 1.958(5)                                                                                |          |
|                   | Li-O(THF)                                                 | 2.039(8)                                                |          | 2.041(5)                                                |          | 2.004(4)                                                                                | 1.976(4) |
|                   |                                                           |                                                         |          |                                                         |          | 2.053(5)                                                                                |          |
|                   | Li-Li<br>(six-member ring)                                | 3.38(1)                                                 |          | 3.364(6)                                                |          | 3.347(5)                                                                                | 3.459(6) |
|                   |                                                           |                                                         |          |                                                         |          | 3.393(6)                                                                                |          |
|                   | Li-Li<br>(four-member ring)                               | 2.65(1)                                                 |          | 2.653(6)                                                |          | 2.627(6)                                                                                | 2.644(5) |
|                   |                                                           |                                                         |          |                                                         |          | 2.639(6)                                                                                |          |
|                   | O-O<br>(six-member ring)                                  | 3.400(4)                                                |          | 3.432(2)                                                |          | 3.422(2)                                                                                | 3.359(2) |
|                   |                                                           |                                                         |          |                                                         |          | 3.451(2)                                                                                |          |
|                   | O-O<br>(four-member ring)                                 | 2.904(4)                                                |          | 2.910(2)                                                |          | 2.948(2)                                                                                | 2.937(2) |
|                   |                                                           |                                                         |          |                                                         |          | 2.912(2)                                                                                |          |
| angle<br>(degree) | Li-O <sub>Ar</sub> -Li<br>(six-member ring)               | 118.6(3)                                                |          | 117.4(2)                                                |          | 115.5(2)                                                                                | 121.0(2) |
|                   |                                                           |                                                         |          |                                                         |          | 119.2(2)                                                                                | 1.990(4) |
|                   | Li-O <sub>Ar</sub> -Li<br>(four-member ring)              | 84.7(3)                                                 | 84.6(3)  | 84.3(2)                                                 | 85.2(2)  | 84.9(2)                                                                                 | 82.6(2)  |
|                   |                                                           |                                                         |          |                                                         |          | 84.3(2)                                                                                 | 83.1(2)  |
|                   |                                                           |                                                         |          |                                                         |          | 84.2(2)                                                                                 | 84.4(2)  |
|                   | O <sub>Ar</sub> -Li-O <sub>Ar</sub><br>(six-member ring)  | 119.8(4)                                                |          | 121.3(2)                                                |          | 119.2(2)                                                                                | 115.9(2) |
|                   |                                                           |                                                         |          |                                                         |          | 122.7(2)                                                                                |          |
|                   | O <sub>Ar</sub> -Li-O <sub>Ar</sub><br>(four-member ring) | 95.3(4)                                                 | 95.4(4)  | 95.8(2)                                                 | 94.7(2)  | 96.4(2)                                                                                 | 96.8(2)  |
|                   |                                                           |                                                         |          |                                                         |          | 95.3(2)                                                                                 | 96.0(2)  |
|                   |                                                           |                                                         |          |                                                         |          | 96.6(2)                                                                                 | 95.4(2)  |
|                   | C-C <sub>methylene</sub> -C                               | 114.3(7)                                                |          | 114.2(3)                                                |          | 113.5(2)                                                                                | 113.2(2) |
|                   |                                                           |                                                         |          |                                                         |          | 113.2(2)                                                                                |          |

**Table S3.** Selected bond lengths [Å] and angles [degree] for  $(\mathbf{1dLi}_3)_2 \cdot (\text{THF})_6$  and  $(\mathbf{1dLi}_3)_2 \cdot (\text{THF})_4$ .

|                   |                                                           | $(\mathbf{1dLi}_3)_2 \cdot (\text{THF})_6 \cdot 0.25(\text{C}_6\text{H}_6)$ |          |          |          | $(\mathbf{1bLi}_3)_2 \cdot (\text{THF})_4 \cdot 3(\text{C}_6\text{H}_6)$ |          |
|-------------------|-----------------------------------------------------------|-----------------------------------------------------------------------------|----------|----------|----------|--------------------------------------------------------------------------|----------|
|                   |                                                           | Part 1                                                                      |          | Part 2   |          |                                                                          |          |
| Length<br>(Å)     | Li-O <sub>Ar</sub><br>(six-member ring)                   | 1.969(5)                                                                    | 1.979(4) | 1.978(5) | 1.975(5) | 1.904(8)                                                                 | 1.919(9) |
|                   |                                                           | 1.986(5)                                                                    | 1.990(4) | 1.963(5) | 1.986(5) | 1.976(8)                                                                 | 1.971(9) |
|                   |                                                           | 1.952(5)                                                                    | 1.974(5) | 1.976(5) | 1.968(5) | 1.94(1)                                                                  | 1.95(1)  |
|                   | Li-O <sub>Ar</sub><br>(vertical)                          | 1.963(5)                                                                    | 1.984(5) | 1.941(5) | 1.969(4) | 1.887(8)                                                                 | 1.967(7) |
|                   |                                                           | 1.941(4)                                                                    |          | 1.946(5) |          | 1.950(8)                                                                 |          |
|                   | Li-O(THF)                                                 | 1.990(5)                                                                    | 2.004(5) | 2.014(5) | 2.016(5) | 1.945(8)                                                                 | 2.001(9) |
|                   |                                                           | 1.987(5)                                                                    |          | 1.989(4) |          |                                                                          |          |
|                   | Li-Li<br>(six-member ring)                                | 3.435(6)                                                                    | 3.356(6) | 3.402(6) | 3.373(6) | 3.561(9)                                                                 | 3.22(2)  |
|                   |                                                           | 3.434(6)                                                                    |          | 3.410(6) |          | 3.15(2)                                                                  |          |
|                   | Li-Li<br>(four-member ring)                               | 2.664(6)                                                                    | 2.668(6) | 2.664(6) | 2.648(6) | 2.58(1)                                                                  | 2.56(1)  |
|                   |                                                           | 2.685(6)                                                                    |          | 2.655(6) |          | 2.62(1)                                                                  |          |
|                   | O-O<br>(six-member ring)                                  | 3.342(2)                                                                    | 3.418(2) | 3.429(2) | 3.407(2) | 3.523(3)                                                                 | 3.252(6) |
|                   |                                                           | 3.452(2)                                                                    |          | 3.426(2) |          | 3.312(6)                                                                 |          |
|                   | O-O<br>(four-member ring)                                 | 2.890(2)                                                                    | 2.855(2) | 2.891(2) | 2.907(2) | 2.889(5)                                                                 | 2.881(4) |
|                   |                                                           | 2.922(2)                                                                    |          | 2.878(2) |          | 2.885(4)                                                                 |          |
| angle<br>(degree) | Li-O <sub>Ar</sub> -Li<br>(six-member ring)               | 118.8(2)                                                                    | 119.2(2) | 117.2(2) | 120.6(2) | 128.9(4)                                                                 | 109.3(4) |
|                   |                                                           | 117.8(2)                                                                    |          | 120.1(2) |          | 113.2(4)                                                                 |          |
|                   | Li-O <sub>Ar</sub> -Li<br>(four-member ring)              | 84.1(2)                                                                     | 85.3(2)  | 86.5(2)  | 84.3(2)  | 83.9(4)                                                                  | 83.3(4)  |
|                   |                                                           | 85.7(2)                                                                     | 85.5(2)  | 84.6(2)  | 84.8(2)  | 83.2(4)                                                                  | 83.0(4)  |
|                   |                                                           | 85.2(2)                                                                     | 85.0(2)  | 83.3(2)  | 83.3(2)  | 84.6(4)                                                                  | 84.4(4)  |
|                   | O <sub>Ar</sub> -Li-O <sub>Ar</sub><br>(six-member ring)  | 120.5(3)                                                                    | 119.0(3) | 120.4(3) | 115.9(3) | 134.3(5)                                                                 | 115.8(5) |
|                   |                                                           | 120.8(3)                                                                    |          | 120.8(2) |          | 111.8(4)                                                                 |          |
|                   | O <sub>Ar</sub> -Li-O <sub>Ar</sub><br>(four-member ring) | 95.3(2)                                                                     | 95.3(2)  | 94.6(2)  | 94.5(2)  | 94.6(4)                                                                  | 98.9(5)  |
|                   |                                                           | 94.7(2)                                                                     | 94.6(2)  | 94.8(2)  | 95.8(2)  | 98.6(5)                                                                  | 94.0(4)  |
|                   |                                                           | 95.1(2)                                                                     | 94.2(2)  | 96.6(2)  | 96.6(2)  | 95.0(4)                                                                  | 95.9(4)  |
|                   | C-C <sub>methylene</sub> -C                               | 113.6(3)                                                                    | 113.1(3) | 113.6(3) | 112.9(3) | 113.3(4)                                                                 | 113.2(5) |
|                   |                                                           | 113.7(3)                                                                    |          | 113.4(3) |          | 112.7(4)                                                                 |          |

## References

1. H. Nakajima, M. Yasuda, K. Chiba, A. Baba, *Chem. Commun.* 2010, **46**, 4794-4796.

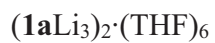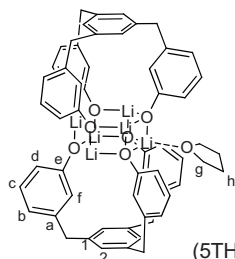

(5THFs is omitted)

$^1\text{H}$  NMR

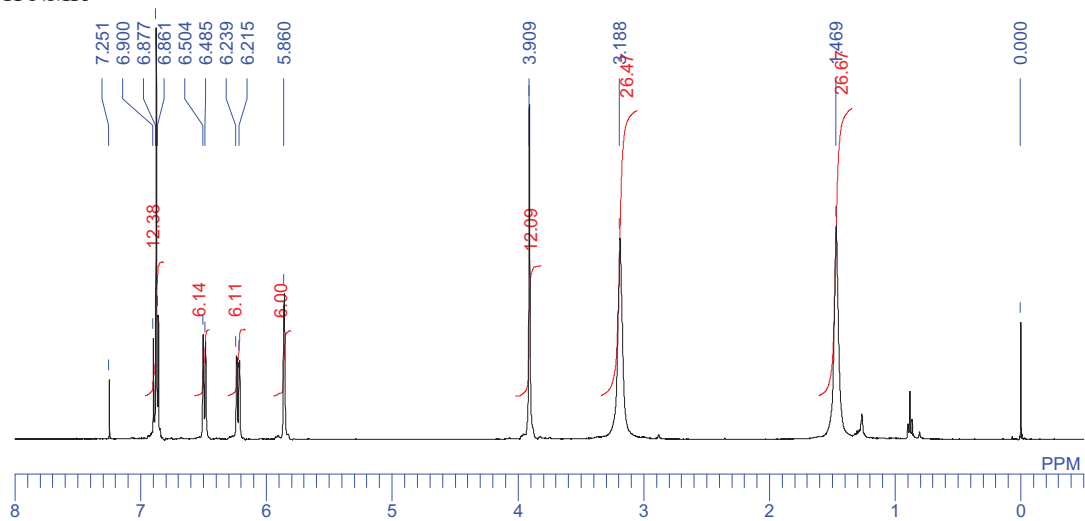

$^{13}\text{C}$  NMR

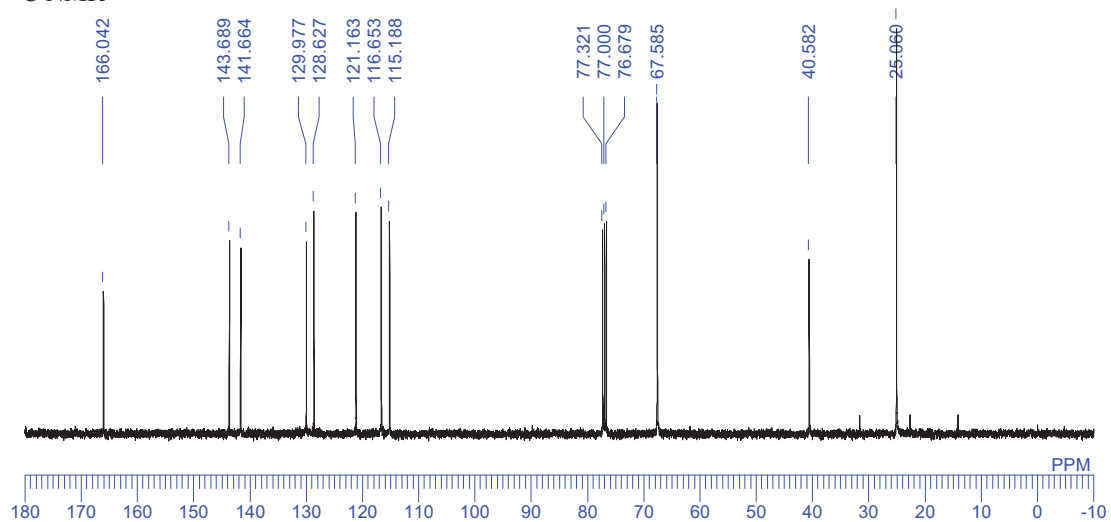

$^7\text{Li}$  NMR

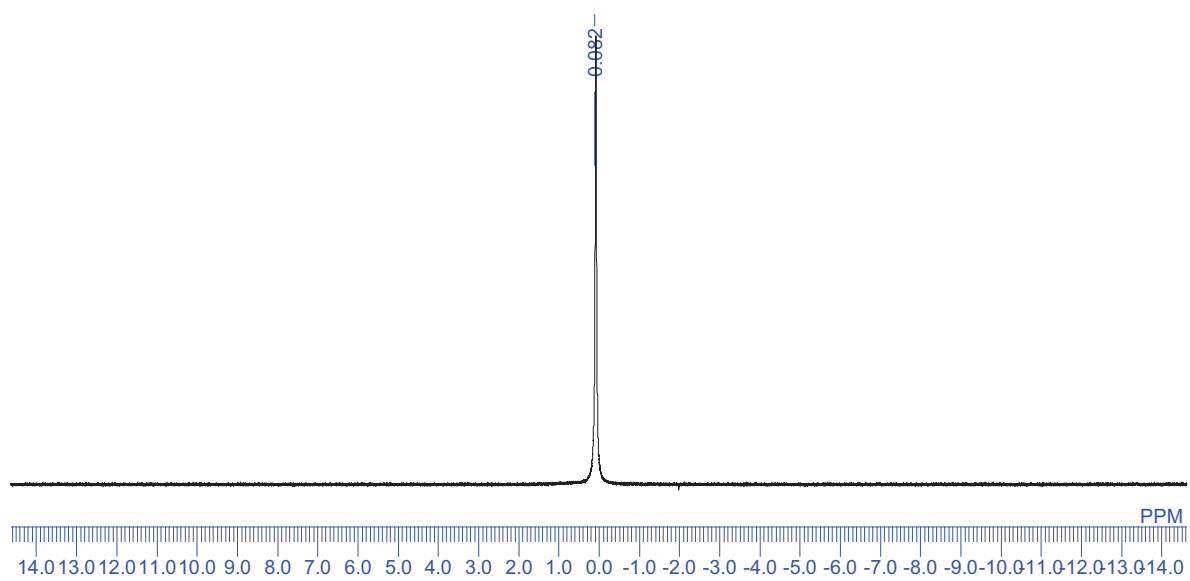

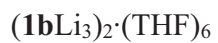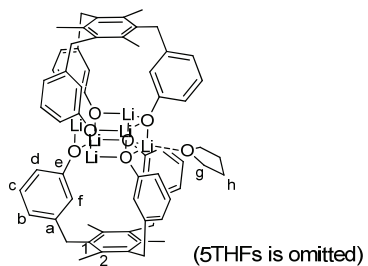

$^1\text{H NMR}$

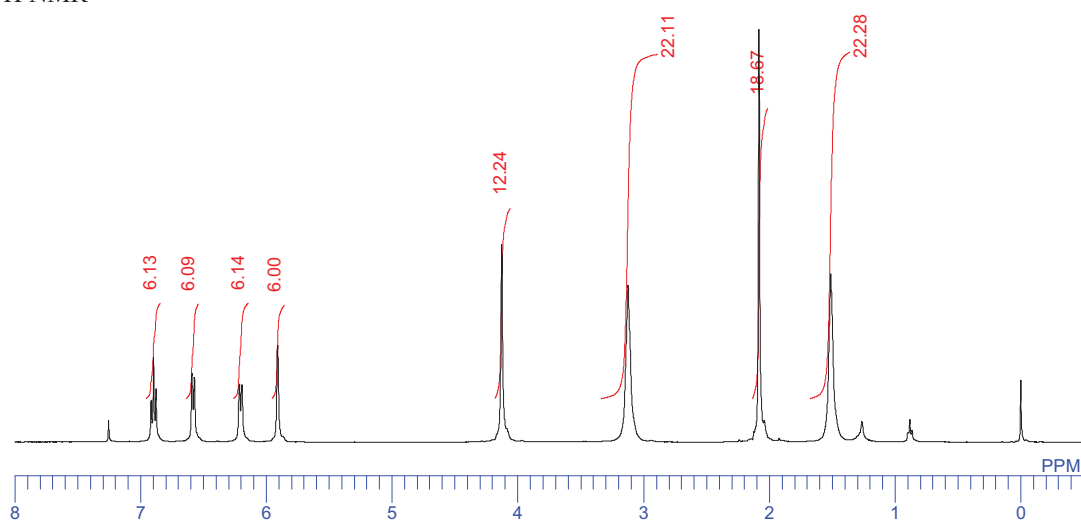

$^{13}\text{C NMR}$

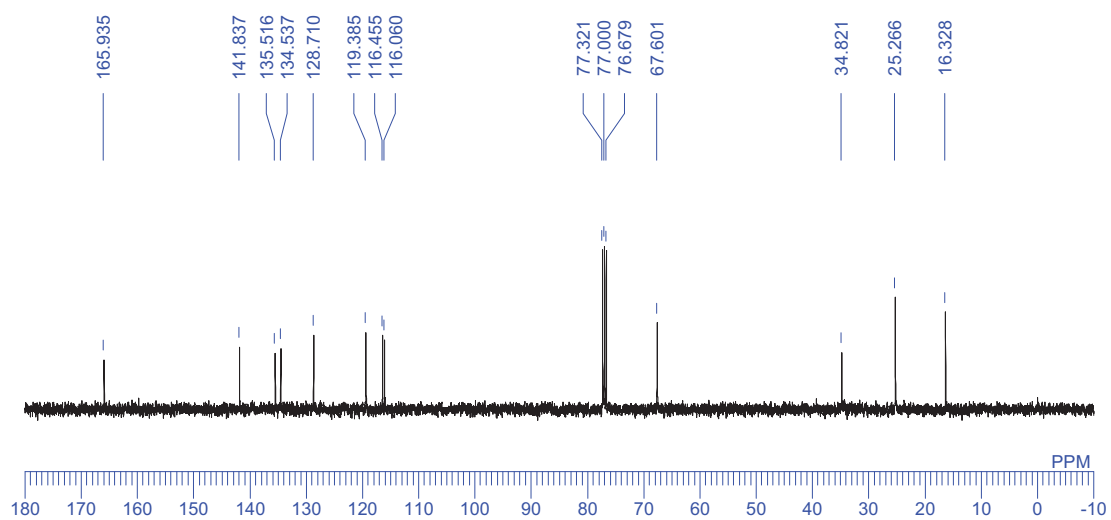

$^7\text{Li}$  NMR

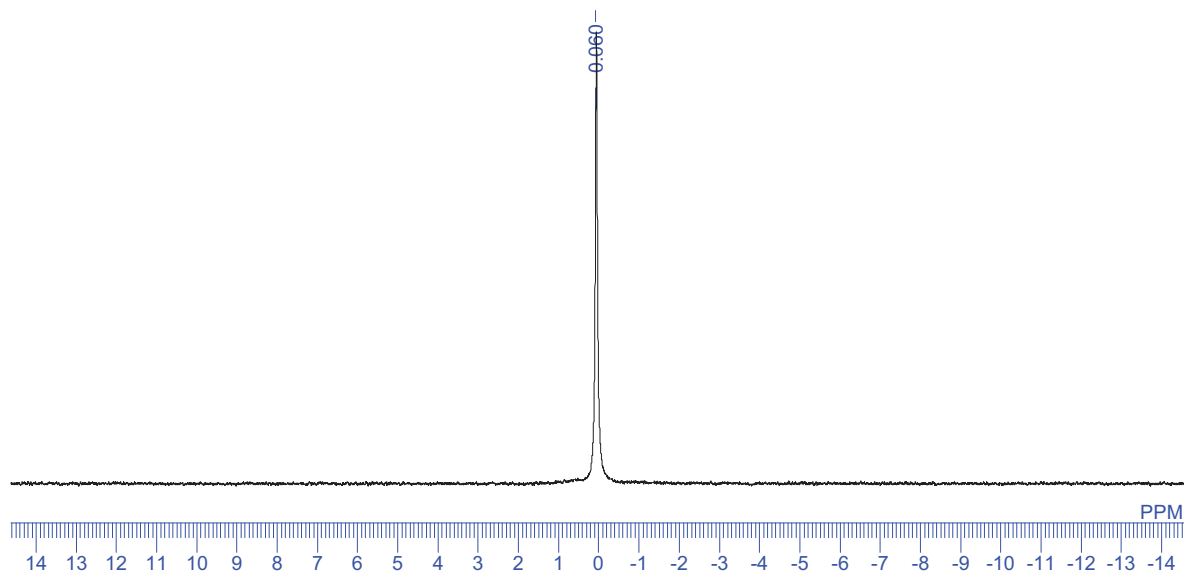



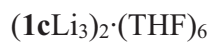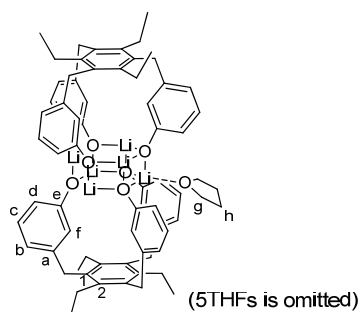

$^1H$  NMR

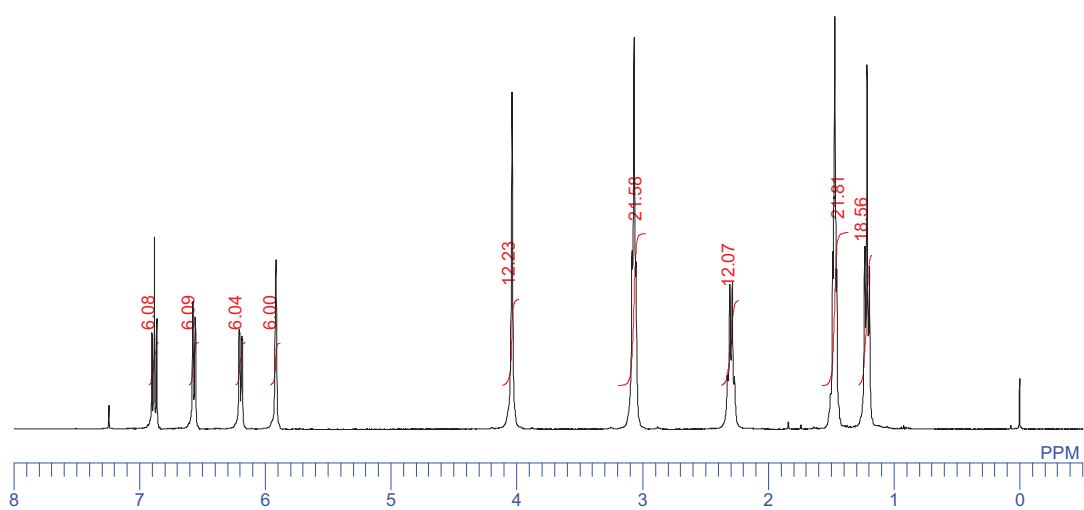

$^{13}C$  NMR

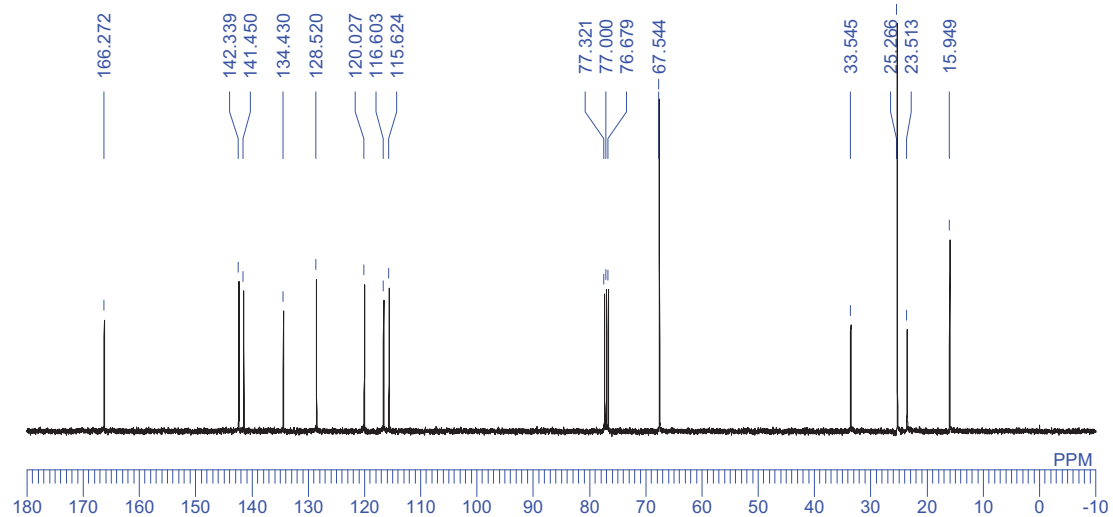

$^7\text{Li}$  NMR

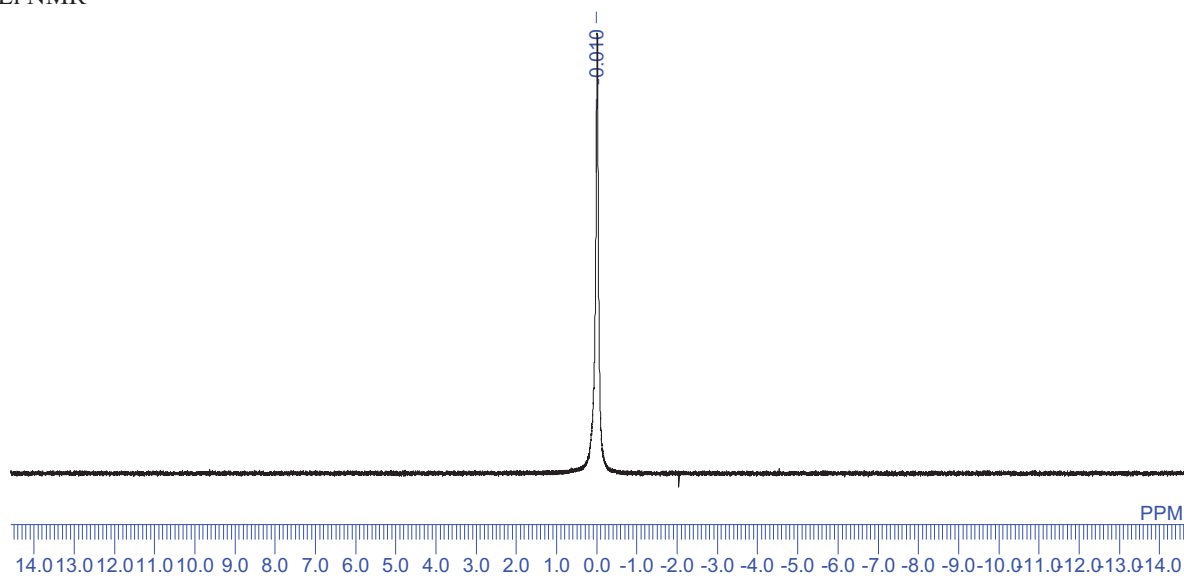

**(1dLi<sub>3</sub>)<sub>2</sub>·(THF)<sub>6</sub>**

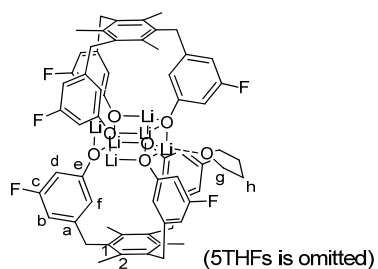

<sup>1</sup>H NMR

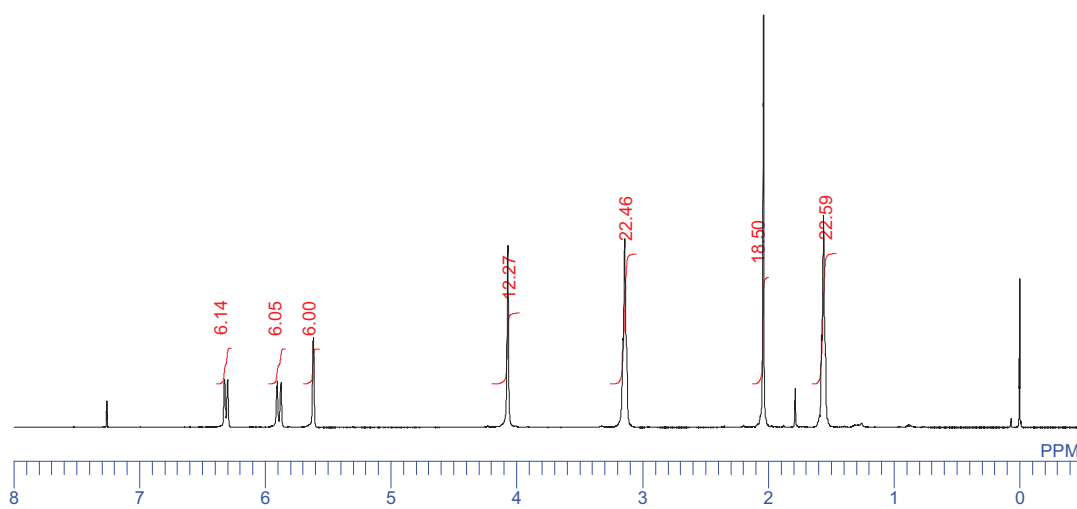

<sup>13</sup>C NMR

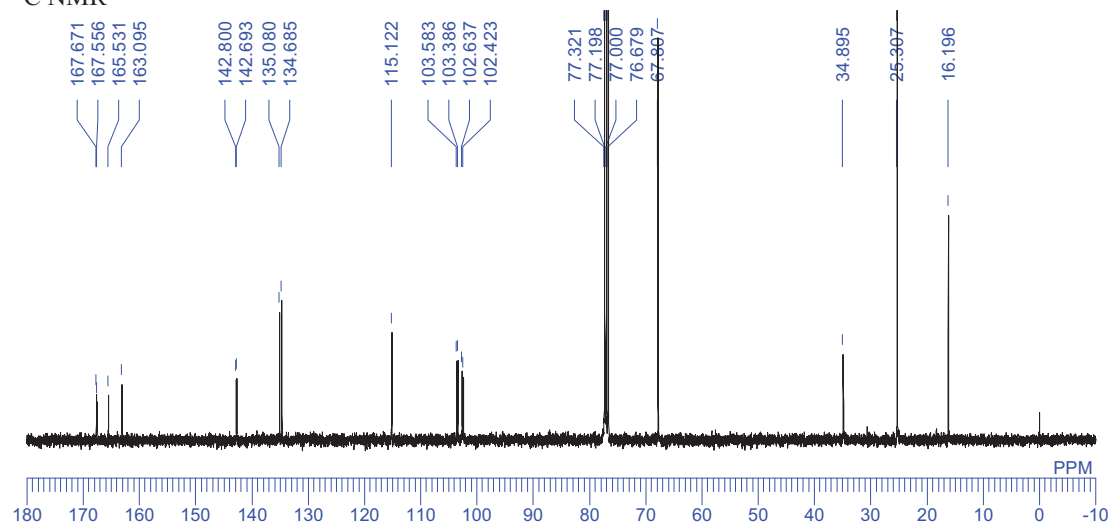

$^{19}\text{F}$  NMR

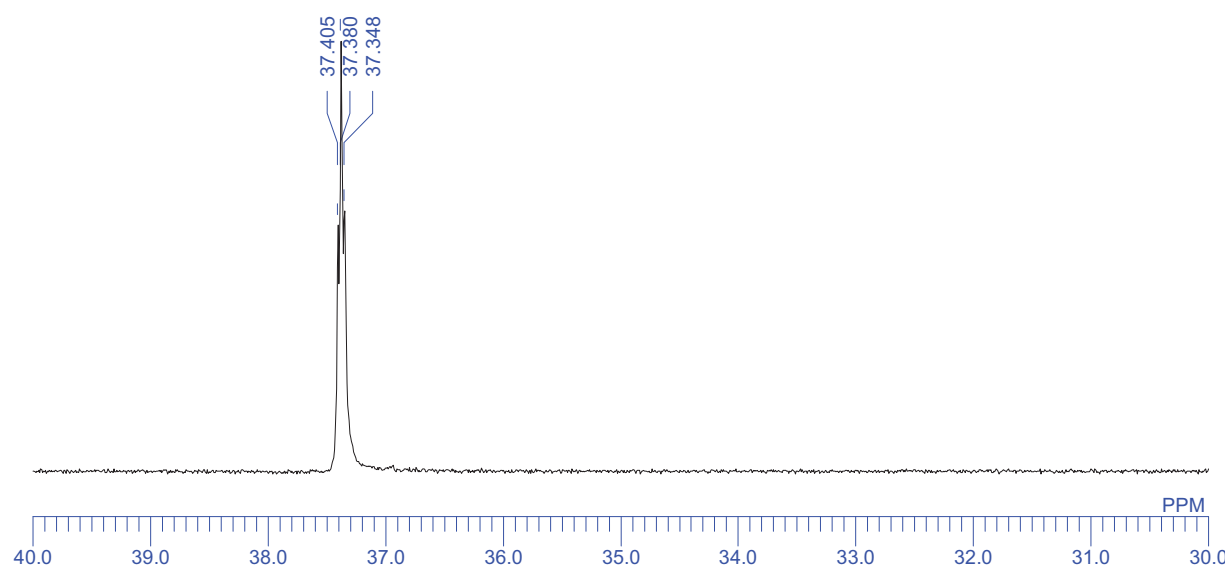

$^7\text{Li}$  NMR

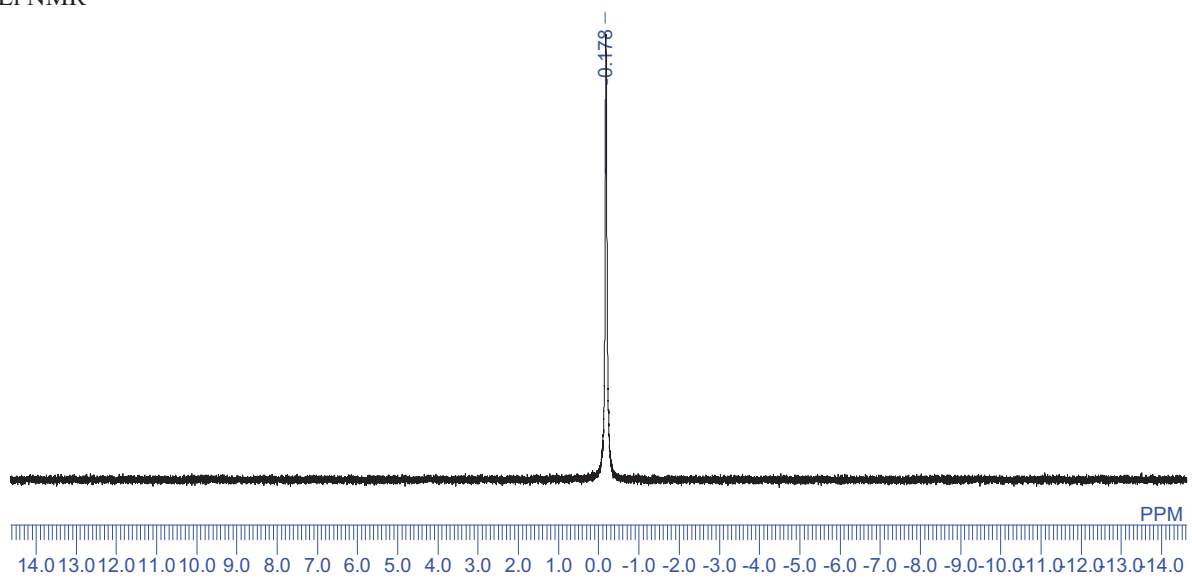

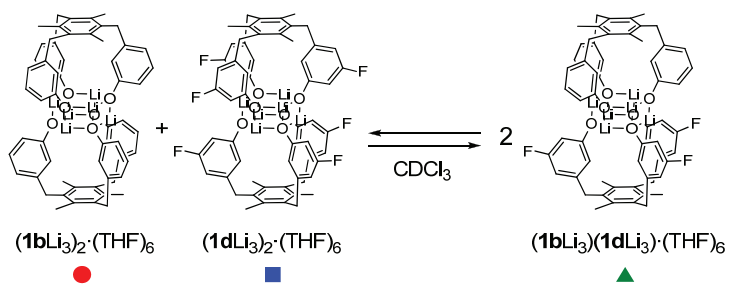

$^1H$  NMR

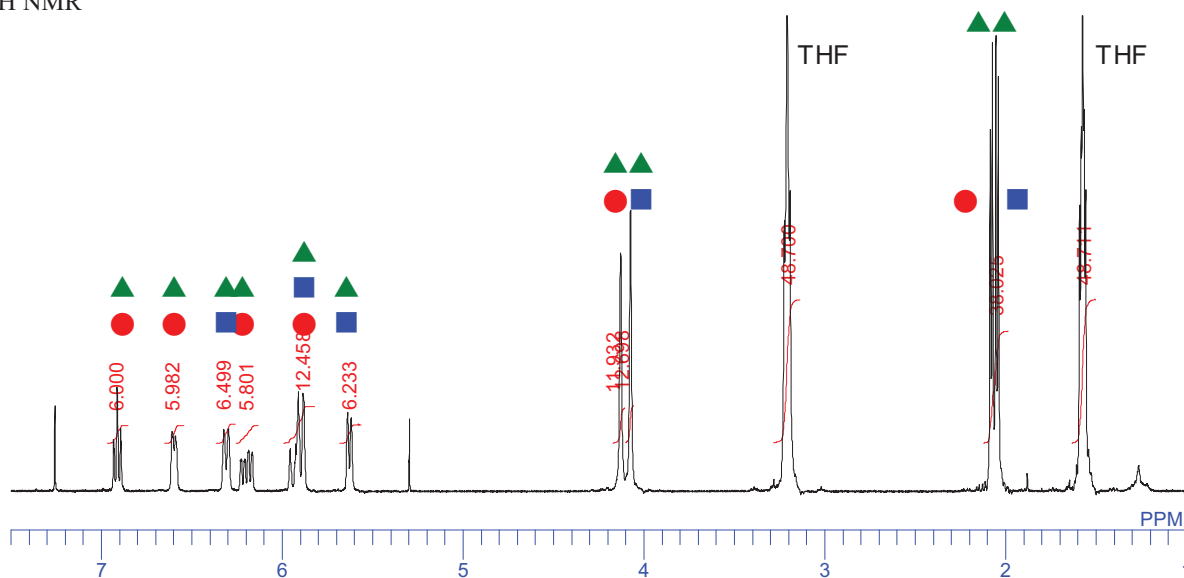

$^{19}F$  NMR

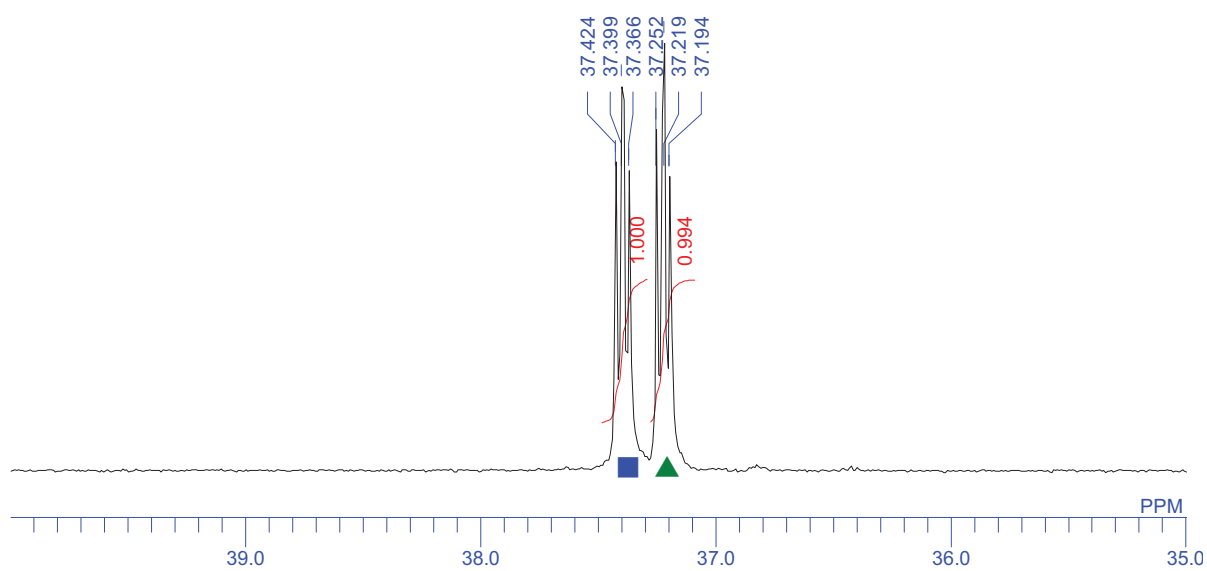

$^7\text{Li}$  NMR

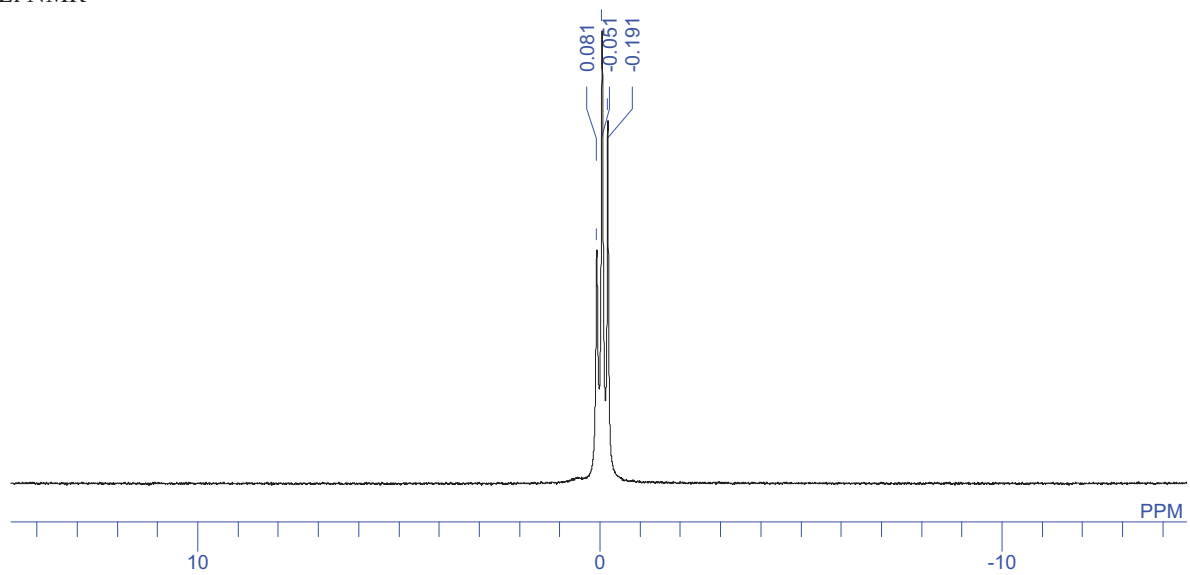

Supplement: c2dt30266g.pdf [file c2dt30266g.pdf]
